# Supplementary material for: U1A is a positive regulator of the expression of heterologous and cellular genes involved in cell proliferation and migration
Source: PubMed Central journal article supplement — Mol Ther Nucleic Acids. 2022 May 10;28:831–46. doi: 10.1016/j.omtn.2022.05.023 (PMC9136276; doi:10.1016/j.omtn.2022.05.023), 2022-05-10
Supplement: mmc1.pdf [file mmc1.pdf]

**Supplemental information**

**U1A is a positive regulator of the expression  
of heterologous and cellular genes  
involved in cell proliferation and migration**

**Eric Rovira, Beatriz Moreno, Nerea Razquin, Roland Hjerpe, Monika Gonzalez-Lopez, Rosa Barrio, Igor Ruiz de los Mozos, Jernej Ule, Fernando Pastor, Lorea Blazquez, and Puri Fortes**

S1A)

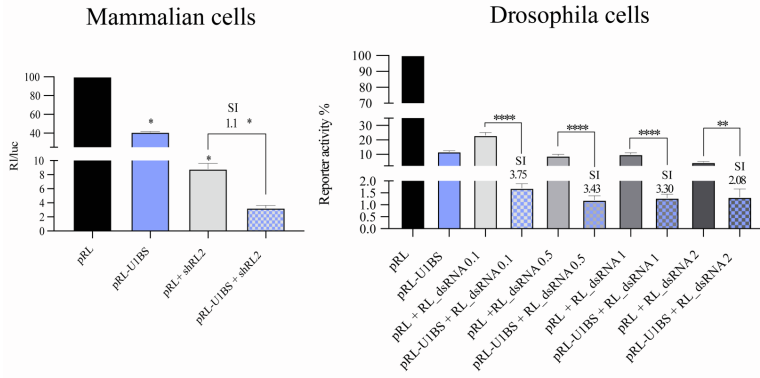

S1B)

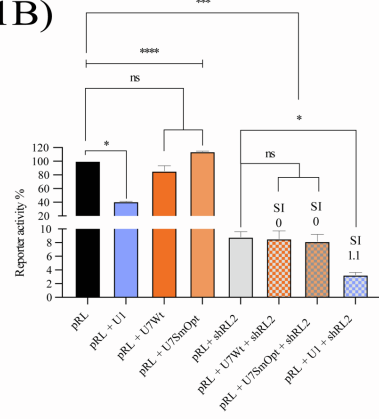

S1C)

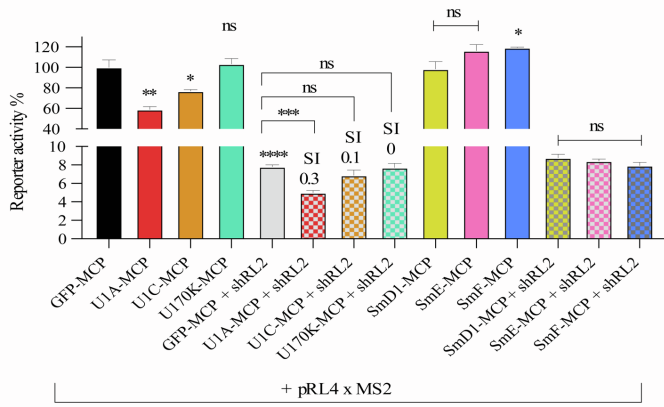

S1D)

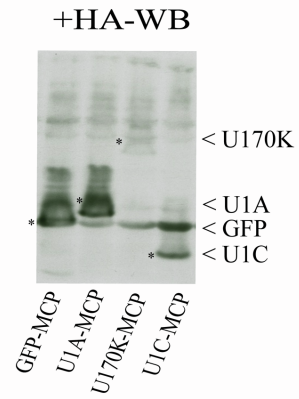

S1E)

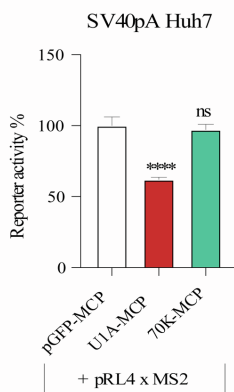

S1F)

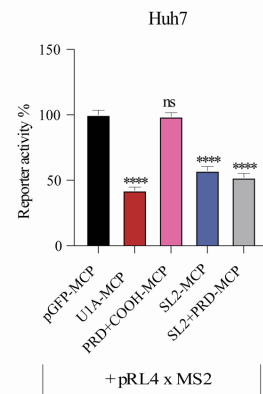

**Figure S1. Related to Figure 1: Inhibition of gene expression by RNAi, U1i or U1 snRNP proteins.** (A) As in Figure 1A but with an additional shRNA in HeLa cells or increasing doses of dsRNA in Fly cells. (B) As in figure 1B but with an additional shRNA (shRL2). (C) As in figure 1C but with an additional shRNA (shRL2). (D) Expression of the GFP, U1A, U170K or U1C-MCP fusion proteins was verified by Western-blot with an anti-HA antibody. The size of the expected proteins is indicated with an asterisk. (E) As in figure 1D but in Huh7 cells co-transfected with a plasmid expressing a R4LxMS2 plasmid with the SV40 canonical 3' end sequence and plasmids expressing the indicated MCP fused proteins. (F) As in D, but the RL4xMS2 plasmid was co-transfected with plasmids expressing MCP fused to U1A or U1A-truncated fragments. All experiments were performed at least three times in triplicates. Error bars show standard error of the mean. The synergy index (SI) was calculated as described<sup>15</sup>. Either two-tailed Student's t-test or one-way ANOVA were employed to compare two or more independent groups respectively. Non-significant differences are indicated with ns. Significant results are indicated as \* p-value < 0.05, \*\* p-value < 0.01, \*\*\* p-value < 0.001 and \*\*\*\* p-value < 0.0001.



**Figure S2. Related to Figure 2: Free U1A binds target genes and is a positive regulator of gene expression.** (A) As in Figure 2A but in HEK293T cells. (B) U1A mRNA or U1 snRNP specific proteins were measured by qRT-PCR (top) or Western Blot (bottom) in HeLa cells transfected with control or U1A-targeting siRNAs. Note that that depletion of U1A does not affect the levels of U170K or U1C. (C) Heatmap showing the results of the Log<sub>2</sub> FC expression changes from the Volcano plot in Figure 2B. The colour code gradient is indicated to the right.

S3A)

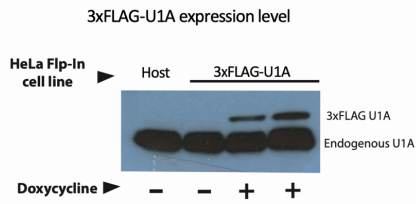

S3B)

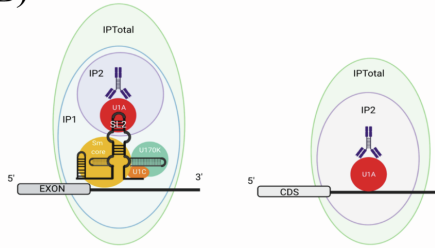

S3C)

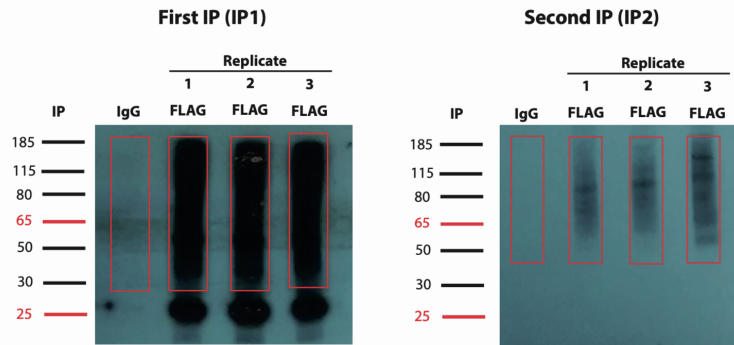

S3D)

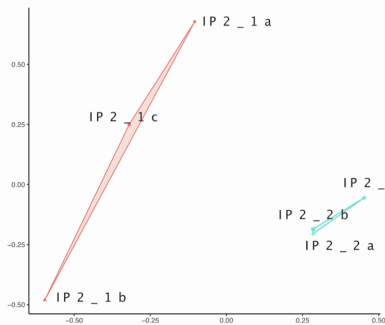

S3E)

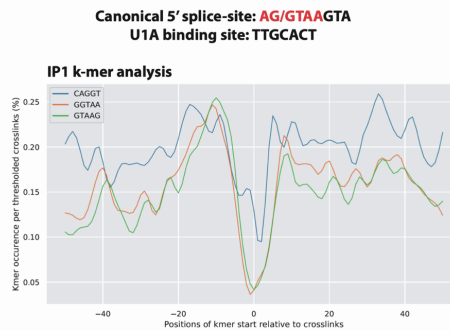

S3F)

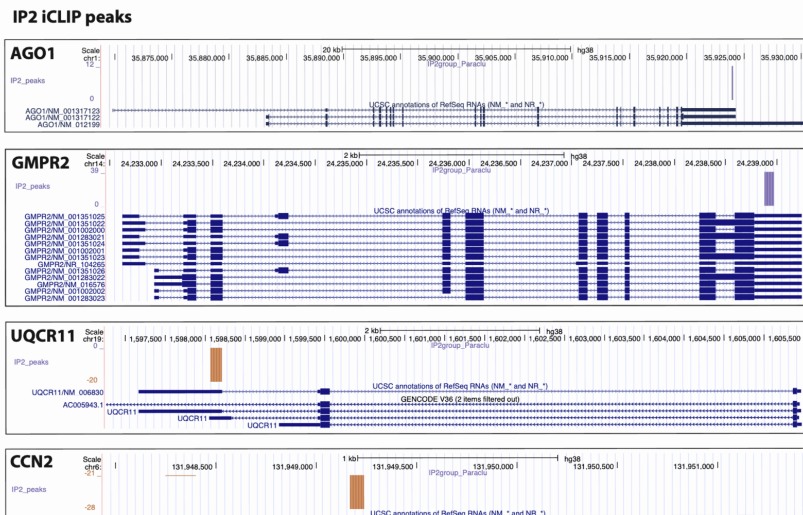

**Figure S3. Related to Figure 2: Free U1A binds target genes and is a positive regulator of gene expression.** (A) Endogenous and 3xFLAG-U1A expression level by Western-Blot with an anti-U1A antibody in host or 3xFLAG-U1A HeLa Flp-In stable cells. The expression of 3XFLAG-U1A is inducible by doxycycline. (B) Schematic representation of the U1 snRNP factors that may coimmunoprecipitate after one (IP1) or two (IP2) rounds of immunoprecipitation with FLAG antibody in 3XFLAG-U1A HeLa Flp-In cell line. (C) Radioactive gel visualization of protein-RNA complexes separated by SDS-PAGE and transferred into a nitrocellulose membrane after one (IP1) or two (IP2) rounds of immunoprecipitation with IgG or FLAG antibody in 3XFLAG-U1A HeLa Flp-In cell line. (D) PCA plot obtained with the iCLIP peak scores for each gene identified in 3 replicates of IP1 and IP2 iCLIP libraries. (E) Graph with the k-mer sequence enriched in IP1 iCLIP data, which shows U1 snRNP consensus sequence. (F) Visualization of U1A binding regions in UCSC obtained from IP2 iCLIP peaks.

S4A)

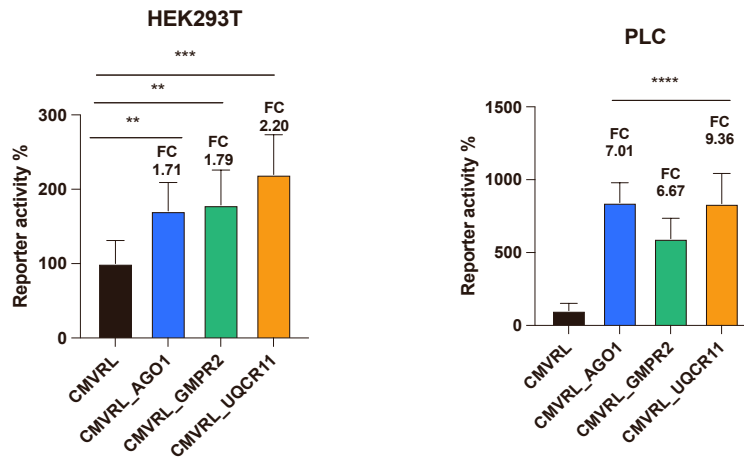

S4B)

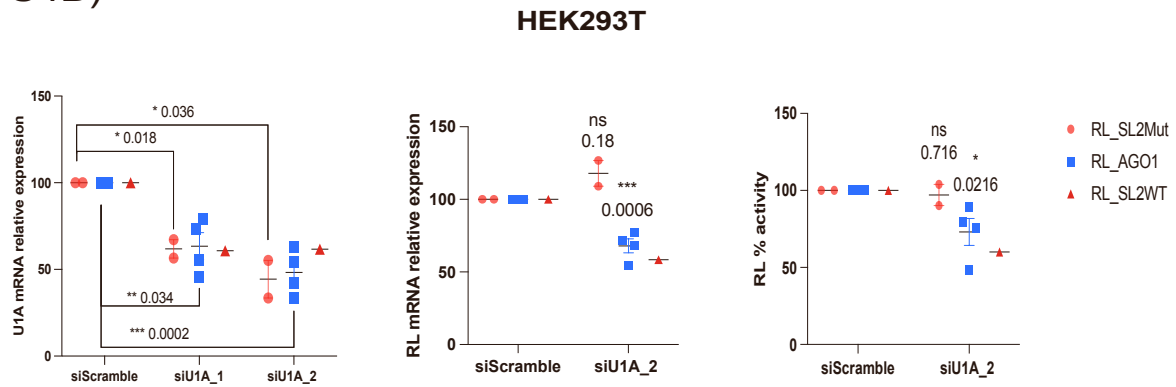

**Figure S4. Related to Figure 3: U1 binding sequences increase reporter expression in 293T and PLC cells.** (A) As in Figure 3C but in HEK293T and PLC cells (B) As in Figure 3D but in HEK293T clones transfected with an additional U1A-targeting siRNA (siU1A\_2). The left graph represents U1A mRNA expression level obtained by qPCR in each HEK293T clone transfected with scramble or U1A siRNAs. Each dot represents the mean of three replicates performed on the same clone. The activity of RL was normalized to that of the control for each clone to estimate the relative RL activity



S5)

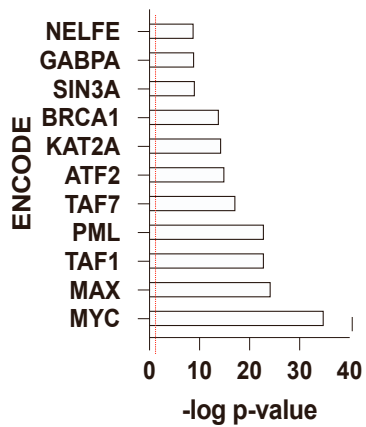

**Figure S5. Related to Figure 4: U1A mRNA levels associate with cancer prognosis and cell growth.** (A) Bar plot representing the enrichment analyses for ENCODE transcription factors in the list of genes that overlap in Figure 4F (U1A-bound genes from IP2 iCLIP data and genes whose expression positively associates ( $R > 0.5$ ) with U1A mRNA levels in TCGA LIHC data).

S6A)

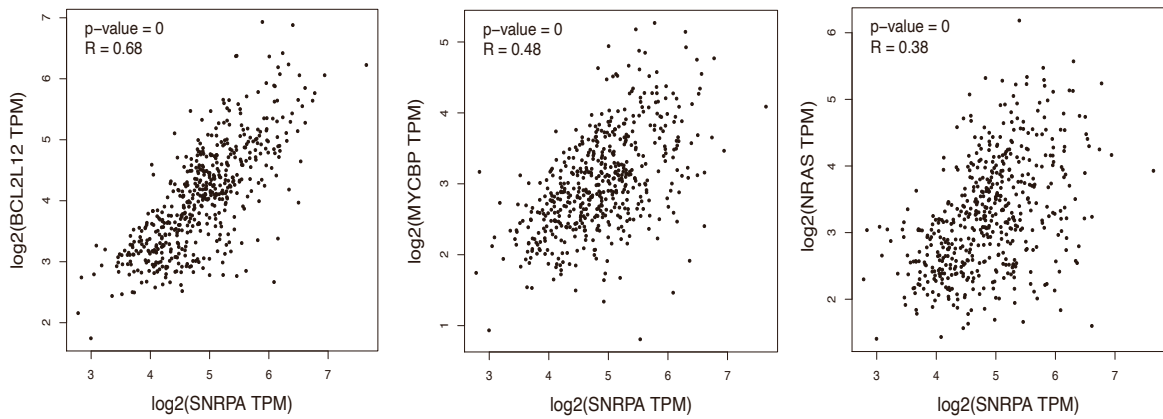

S6B)

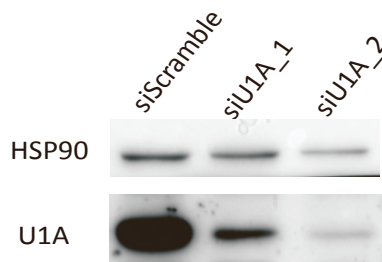

S6C)

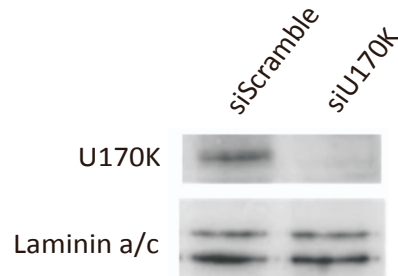

**Figure S6. Related to figure 5: U1A upregulates several oncogenes and promotes cell migration.** (A) Association between U1A and BCL2L12, NRAS or MYCBP mRNA levels in LIHC using TCGA data. All analyses have been performed using GEPIA2. (B) U1A protein levels obtained by Western Blot in JHH6 cells after inhibition with two different U1A targeting siRNAs. HSP90 was used as a loading control. (C) U170K protein levels obtained by Western Blot in JHH6 cells after transfection with scramble or U170K targeting siRNAs. Lamina/b was used as a loading control.

S7A)

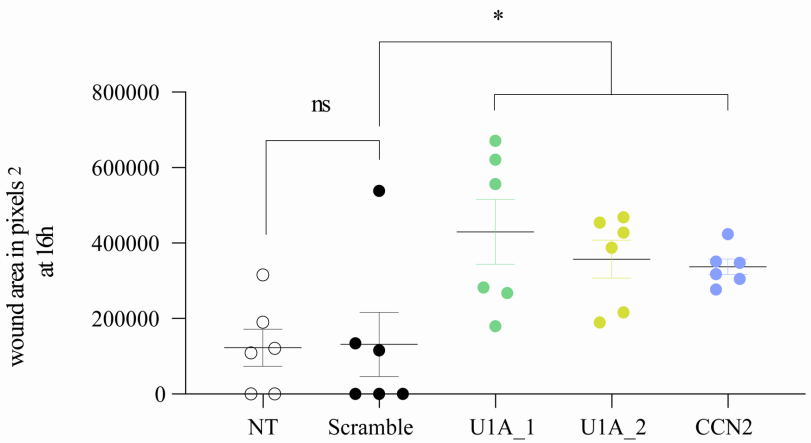

S7B)

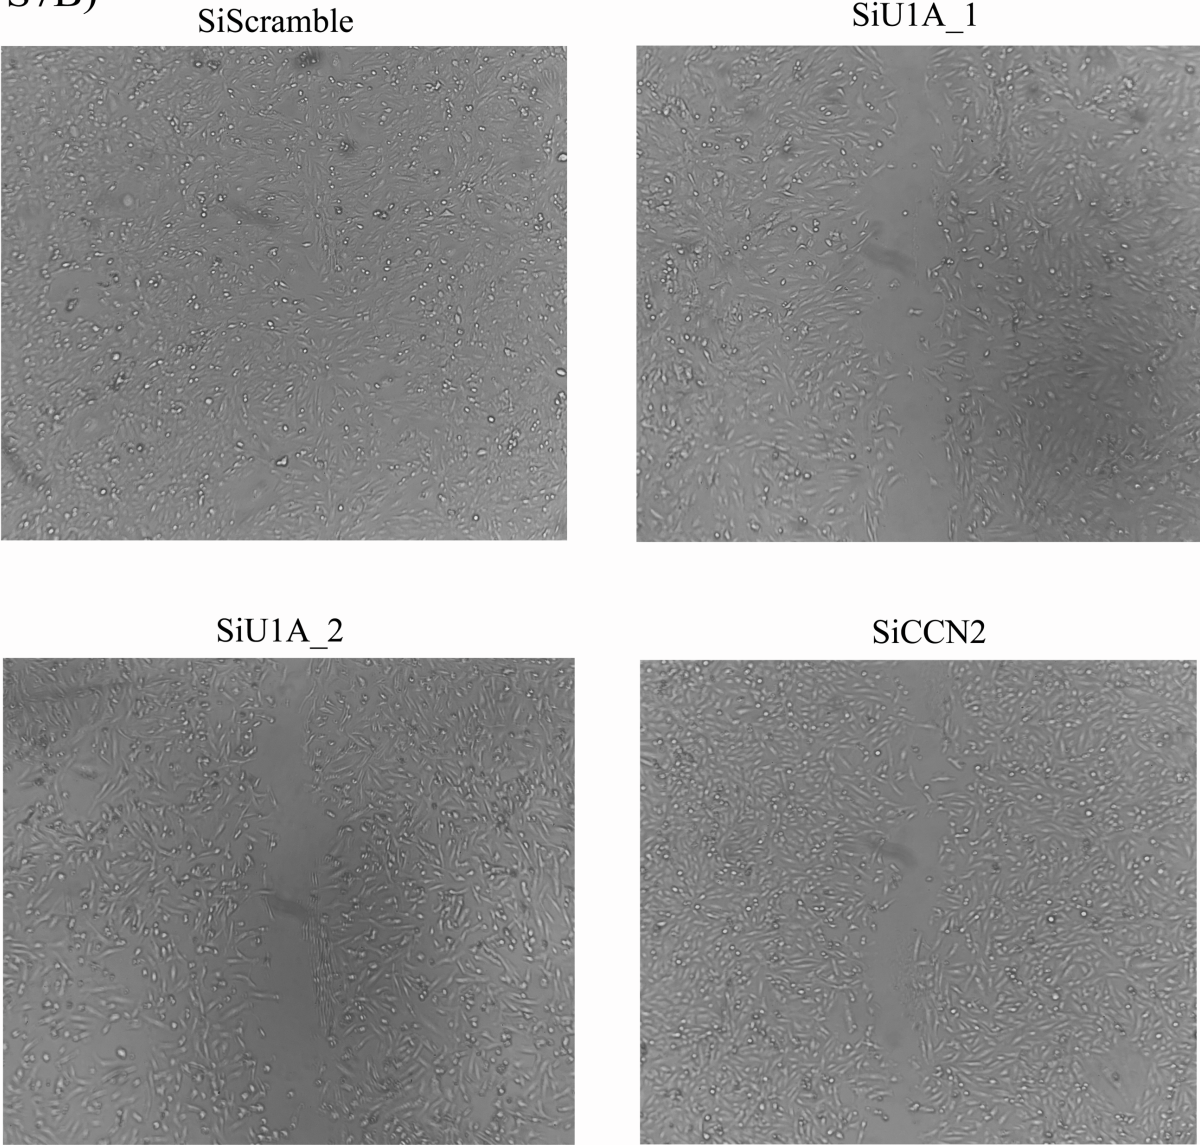

**Figure S7. Related to Figure 5: U1A knockdown affects cell migration.** JHH6 cells were transfected with two independent siRNAs targeting U1A, an siRNA targeting CCN2 and a scramble siRNA. 24h after transfection the wound healing assay was set on M12 well plates. (A) Quantification with FIJI image software analysis of the cell-depleted area in squared pixels of images taken 16 hours after the wound was performed. Each dot plotted represents a replicate. Error bars show standard error of the mean. One-way ANOVA was employed to compare the means of all siRNA-transfected cells. Two tailed Student's t test was employed to compare the not transfected (NT) and Scramble means. Ns indicates not significant, \* indicates p-value <0.05. (B) Representative images taken under bright field microscope 16 hours after the wound was performed.

**Table S1: Genes deregulated after U1A depletion**

**Table S2: U1A targets identified by iCLIP (IP2)**

**Table S3: Nucleic acid sequences used in this study:**

**pCMV-RL plasmid constructs:**

| Name                           | Sequence (5' -> 3')                                                                                                                                                                                                                                                                                                                                                                                                                                                                          |
|--------------------------------|----------------------------------------------------------------------------------------------------------------------------------------------------------------------------------------------------------------------------------------------------------------------------------------------------------------------------------------------------------------------------------------------------------------------------------------------------------------------------------------------|
| pCMV-RL-pL-WT-U1BS polylinker  | GCTAGCtcgcgAAGCTTgtcgacTCTAGAtgcaattcgtggCAGGTAAGTATAaattcgGAATTCagatctCTCGAGatatacGCTAGC                                                                                                                                                                                                                                                                                                                                                                                                    |
| pCMV-RL-pL-Mut-U1BS polylinker | GCTAGCtcgcgAAGCTTgtcgacTCTAGAtgcaattcgtggCatGgAAcTATAaattcgGAAATTCagatctCTCGAGatatacGCTAGC                                                                                                                                                                                                                                                                                                                                                                                                   |
| pCMV-RL-pL-4xMS2               | TCTAGATACGGTACTTATTGCCAAGAAAGCACGAGCATCAGCCGTGCCTCCAGGTCTGAATCTTCAAACGACGACGATCACGCGTCGCTCCAGTATTCCAGGGTTCATCAGATCCGGTAACCTACGGTACTTATTGCCAAGAAAGCACGAGCATCAGCCGTGCCTCCAGGTCTGAATCTTCAAACGACGACGATCACGCGTCGCTCCAGTATTCCAGGGTTCATCAGATCCGAATTC                                                                                                                                                                                                                                                |
| MALAT1 3'end sequence          | TCTAGACAGTAGGGTCATGAAGGTTTTCTTTTTCTGAGAAAACAACACGTATTGTTTTCTCAGGTTTTGCTTTTTGGCCTTTTTCTAGCTTAAAAAAAAAAAAAGCAA AAGATGCTGGTGGTTGGCACTCCTGGTTTCCAGGACGGGGTTCAAATCCCTGC GCGTCTTTGCTTTGACTACTAATCTGTCTTCAGGACTCTTTCTGTATTTCTCCTT TTCTCTGCAGGTGCTAGTTCTTGGAGTTTTGGGGAGGTGGGAGGTAACAGCAC AATATCTTTGAACTATATACATCCTTGATGTATAATTTGTCAGGAGCTTGACTTG ATTGTATATTCATATTTACACGAGAACCTAATAACTGCCTTGCTTTTTTCAGG TAATAGCCTGCAGCTGGTGTGTTTGGAGAAGCCCTACTGCTGAAAACCTAACAATT TTGTGTAATAAAAAATGGAGAAGCTCTAAAGGATCC |
| SL2 WT sequence                | Fw: CTAGTTCGACATCGTCGCGATTGCACTCCC GCGACGGTTCGACAC<br>Rv: AATTGTGTCGACCGTCGCGGGAGTGCAATCGCGACGATGTCGAA                                                                                                                                                                                                                                                                                                                                                                                       |
| SL2 Mut sequence               | Fw: CTAGTTCGACATCGTCGCGAGGATCCTCCC GCGACGGTTCGACAC<br>Rv: AATTGTGTCGACCGTCGCGGGAGTGCAATCGCGACGATGTCGAA                                                                                                                                                                                                                                                                                                                                                                                       |
| 3'UTR of UQCR11                | TCTAGAGGTGCTAGCTCCTCCACCTCAGCACCTGCTGCATCTGGAGCAGCCCA AGCCTCAGGATGGACAAGAGGAAACCCACAGCTCAGCTTCAGGCTTCTTATGT TTCTGAAAACAGCTTGGATATTTAATGCACGTTGCATTAAGAATTC                                                                                                                                                                                                                                                                                                                                   |
| 3'UTR of GMPR2                 | TCTAGATAGACCTGAGCAGTTCTACCCTCCCAAGGCACCAGTACTCTACCATGG GGCATCCCAAGTGGGGTCCTCACCATCCCAGCTACTGCAGCTCTGTACTTCTT TGTCATTTCTGTTGTCTCACTCCTGAGGGCTCCTGCAGTAACTCTGTACTTCTCT ATCTGCACACACAAAATGCCAAGGCACTCACTGGGGAGGAAGCAAGGAAGC AAACAGTCTGAGAAAATGATGCAAGAAAATCAAATGGGAATCTGGGGACCCA ACACAACATCCTGAAGATTATTAAGGAAAAGATGCTGATTGGTACATAAAT CTTTTACATGGCCTTGGaggcctGGAGGCAGGCTTTTAGAATCATGTTTTGTTAAT CCGCTTCACTAAATTGGACCTTCACATATCTAAAAGCTCTGAAGTGTGTTGTATA TTTGAAATACCTCAATAAAGAATTC                 |

|                  |                                                                                                                                                                                                                                                                                                                                                                                       |
|------------------|---------------------------------------------------------------------------------------------------------------------------------------------------------------------------------------------------------------------------------------------------------------------------------------------------------------------------------------------------------------------------------------|
| 3'UTR of<br>AGO1 | TCTAGAAATTACTTTCTGTGCACACAGTCCAGCCTAATTGGTATGTGATGTTGC<br>ACTTAGCAGCCATGTGGTGGGCATGTGTGACTACTCTGGTTTTCACTTTAGTTTC<br>TAAACTTTTTATCCCTCTCAAGTCCAGCATGGATGGGGAAATGTCTCTGGtaCCC<br>CACAGCTGTGTACTTGTGGTTCATTTGTTTCCCTTTGAGATTTGTGTTTGTGTCCTG<br>CTTTGAGCTGTACCTTGTCCAGTCCATTGTGAAATTATCCAGCAGCTGTAATGT<br>ACAGTTCCTTCTGAAGCAAGCAACATCAGCAGCAGCAGCAGCAGCAGCACAAT<br>TCTGTGTTTTATAAAGAATTC |
|------------------|---------------------------------------------------------------------------------------------------------------------------------------------------------------------------------------------------------------------------------------------------------------------------------------------------------------------------------------------------------------------------------------|

#### Plasmids expressing U snRNAs:

| Name                | Sequence (5' -> 3')                            |
|---------------------|------------------------------------------------|
| U7aU1MUT-<br>SmWT   | AATAGTTCATGGCAAATTTGTCTAGTAGGCTTTCTGGCTTTTTACC |
| 3'U7aU1MUT<br>-SmU1 | AATAGTTCATGGCAAATTTTTGGAGTAGGCTTTCTGGCTTTTTACC |

#### Tethering oligos:

| Name              | Sequence (5' -> 3')                                                                                   |
|-------------------|-------------------------------------------------------------------------------------------------------|
| U1A-tether        | Fw: GGATCCACCGGTCGCCACCATGGCAGTTCCCGAGACCCG<br>Rv: TGCAGAATCGATCTACTTCTGGCAAAGGAGA                    |
| U1C-tether        | Fw: GGATCCACCGGTCGCCACCATGCCAAG TTTTATTGTGA<br>Rv: TGCAGAATCGATTTATCTGTCTGGTCGAGTCA                   |
| U170K-tether      | Fw:GGATCCACCGGTCGCCACCATGACCCAGTTCCTGCCGCC<br>Rv: TGCAGAATCGATTCCTCCGGCGCAGCCTCCA                     |
| AgeINotI-<br>SmB  | F: ATCCACCGGTTGGCGGCCGCATGACGGTGGGCAAGAGCAG<br>R: CAGAAGATCTATCGATCTAGGGCCTTGGTGGGCGCA                |
| XmaINotI-<br>SmD1 | F: ATCCCCGGGTGGCGGCCGCATGAAGCTCGTGAGATTTTT<br>R: CAGAAGATCTATCGATTTATCGCCTAGGACCCCTC                  |
| XmaINotI-<br>SmD2 | F: ATCCCCGGGTGGCGGCCGCATGAGCCTCCTCAACAAGCC<br>R: CAGAAGATCTATCGATCTACTTGGCGGCGATGAGCG                 |
| XmaINotI-<br>SmD3 | F: ATCCCCGGGTGGCGGCCGCATGTCTATTGGTGTGCCGAT<br>R: CAGAAGATCTATCGATTTATCTTCGTTTTGAAAGA                  |
| XmaINotI-<br>SmE  | F: ATCCCCGGG TGGCGGCCGCATGGCGTACCGTGGCCAGGG<br>R: CAGAAGATCTATCGATC TAGTTGGAGACACTTTGTA               |
| XmaINotI-<br>SmF  | F: ATCCCCGGGTGGCGGCCGCATGAGTTTACCCCTCAATCC<br>R: CAGAAGATCTATCGATCTATTCTCTCATTTC CCAT                 |
| XmaINotI-<br>SmG  | F: ATCCCCGGGTGGCGGCCGCATGAGCAAAGCTCACCCCTCC<br>R: CAGAAGATCTATCGATTTATACTCGTTCCAAGGCTT                |
| U1A-101-ClaI      | R: CAGAATCGATTGA GAAGGTGCCTTTCATCTTGGC                                                                |
| U1A-115-ClaI      | R: CAGAATCGATTAGCTCTTGG GCTTCCTCTTCT                                                                  |
| U1A-102-<br>AgeI  | F: ATCCACCGGTCGCCACCATGGTGGAGCGGGACCGCAAG                                                             |
| PRD-Wt            | F: CCGGAGCGGGACCGCAAGCGGGAGAAGAGGAAGCCCAAGAGCTAAA<br>R: TCGATTTAGCTCTTGGGCTTCTCTTCTCCCGCTTGGCGTCCCGCT |

**In-fusion primers:**

| Name                 | Sequence (5' -> 3')                                          |
|----------------------|--------------------------------------------------------------|
| SBSfiT7F             | GTGTCGTGAAAAC TACCCAAGCTGGCCTTGAGGCCTAATACGACTCACTATAG<br>G  |
| NotCMVRLSfi<br>pASBR | CTCTAGAGAATTGATCCCAAGCTTGGCCTGACAGGCCGTCTGCTCGAAGCGG<br>CCGC |

**Primers to generate dsRNA for *Drosophila melanogaster*:**

| Name  | Sequence (5' -> 3')                         |
|-------|---------------------------------------------|
| T7RLF | TAATACGACTCACTATAGGGAGAGATAACTGGTCCGCAGTGGT |
| T7RLR | TAATACGACTCACTATAGGGAGACAACATGGTTTCCACGAAGA |

**RNA interference (RNAi):**

| Name       | Sequence (5' -> 3')                                                                                                                                      |
|------------|----------------------------------------------------------------------------------------------------------------------------------------------------------|
| siU1A_1    | CCUUUAAGACUUACCUCAA                                                                                                                                      |
| siU1A_2    | GAGGUUUGGUUUUUCACAA                                                                                                                                      |
| siU170K    | CCUUUAAGACUUACCUCAA                                                                                                                                      |
| siScramble | <i>SIC001 - Merck</i>                                                                                                                                    |
| shRL1      | S: GATCCCCGAAAGTTTATGATCCAGAATTCAAGAGATTCTGGATCATAAACTT<br>TCTTTTTGGAAA<br><br>AS: AGCTTTTCCAAAAAGAAAGTTTATGATCCAGAATCTCTTGAATTCTGGATC<br>ATAAACTTTCTGGG |
| shRL2      | S: GATCCCCGCATCAAGATAAGATCAAATTCAAGAGATTTGATCTTATCTTGAT<br>GCTTTTTGGAAA<br><br>AS: AGCTTTTCCAAAAAGCATCAAGATAAGATCAAATCTCTTGAATTTGATCTT<br>ATCTTGATGCGGG  |

**qRT-PCR primers:**

| Name     | Sequence (5' -> 3')  |
|----------|----------------------|
| U1A_Fw   | ACCCGCCCTAACCACACTAT |
| U1A_Rv   | GGCTCCGTGATACCAGGATA |
| AGO1_Fw  | AGATCAAAGTCTGGGCCATC |
| AGO1_Rv  | GCAGCCCTGAGTAGGTGTTC |
| GMPR2_Fw | CAGCAAACCTTTGCCACTGA |
| GMPR2_Rv | CAGCAAACCTTTGCCACTGA |

|            |                        |
|------------|------------------------|
| UQCR11_Fw  | GGTACCCAGTCCAGGATCAG   |
| UQCR11_Rv  | TACCGGGAGCTGGTCAAG     |
| RL_Fw      | GCAAATCAGGCAAATCTGGT   |
| RL_Rv      | CCATTCATCCCATGATTCAA   |
| U170K_Fw   | TCCGGAGAATGGGTATTTGA   |
| U170K_Rv   | GGACAAACTCAAGTGGCCAA   |
| BCL2L12_Fw | AGACCGCAAGTTGAGTGGAGGA |
| BCL2L12_Rv | AGCCTCACCACGCCTAAGGAAG |
| CCN2_Fw    | ACCTGTGGGATGGGCATCTC   |
| CCN2_Rv    | CGGATGCACTTTTTGCCCTTC  |
| MYCBP_Fw   | AGAGCTGCTTCGCCTAGAAGT  |
| MYCBP_Rv   | ATTCAGCACGCTTCTCCTCCTG |
| NRAS_Fw    | GAAACCTCAGCCAAGACCAGAC |
| NRAS_Rv    | GGCAATCCCATACAACCCTGAG |
| RRAS_Fw    | GATCTGCCTTGTTCCCGACCAA |
| RRAS_Rv    | CTGCTGGTGTTCGCCATTAACG |
| FN1_Fw     | CTGCGAGAGTAAACCTGAA    |
| FN1_Rv     | TCCCAGATCATGGAGTCTTT   |
| CDH2_Fw    | ATGTGCATGAAGGACAGCCT   |
| CDH2_Rv    | CATGCCATCTTCATCCACCT   |
| RPLP0_Fw   | CCATTCATCCCATGATTCAA   |
| RPLP0_Rv   | ACTCAGGATTTCAATGGTGCC  |
